# Supplementary material for: Bioactivity-guided isolation of the major anthocyanin fromLycium ruthenicumMurr. fruit and its antioxidant activity and neuroprotective effectsin vitroandin vivo
Source: Royal Society of Chemistry journal article supplement (doi:10.1039/d1fo04095b), 2022-01-01
Supplement: d1fo04095b1.pdf [file d1fo04095b1.pdf]

## Supplementary materials

**Table S1 NMR data for prepared anthocyanin (Pn3G5G)**

| Position               | $\delta$                                              | $\delta$ |
|------------------------|-------------------------------------------------------|----------|
| <b>petunidin</b>       | H                                                     | C        |
| 2                      |                                                       | 163.9    |
| 3                      |                                                       | 146.7    |
| 4                      | 8.96 (1H, S)                                          | 133.7    |
| 5                      |                                                       | 157.3    |
| 6                      | 7.07 (1H, s, 6-H or 8-H)                              | 105.3    |
| 7                      |                                                       | 168.4    |
| 8                      | 6.97 (1H, s, 6-H or 8-H),                             | 97.7     |
| 9                      |                                                       | 156.4    |
| 10                     |                                                       | 113.4    |
| 1'                     |                                                       | 119.7    |
| 2'                     | 8.09, 1H, S                                           | 108.9    |
| 3'                     |                                                       | 149.0    |
| 4'                     |                                                       | 146.7    |
| 5'                     |                                                       | 146.4    |
| 6'                     | 7.77(1H, d, J=2.2 Hz)                                 | 114.5    |
| OMe                    | 3.95(3H, s, OCH <sub>3</sub> )                        | 57.2     |
| <b>3-O-glucosyl</b>    |                                                       |          |
| 1                      | 5.51 (1H, d=10.2 Hz, 3G, 3-glycosyl portion)          | 101.6    |
| 2                      | 3.89-3.47 (1H, m)                                     | 74.6     |
| 3                      | 3.89-3.47 (1H, m)                                     | 77.4     |
| 4                      | 3.89-3.47 (1H, m)                                     | 71.5     |
| 5                      | 3.89-3.47 (1H, m)                                     | 77.3     |
| 6                      | 4.07 m                                                | 67.5     |
| <b>rhamnosyl</b>       |                                                       |          |
| 1                      | 4.79 (1H, s)                                          | 101.4    |
| 2                      | 3.89-3.47 (1H, m)                                     | 71.6     |
| 3                      | 3.89-3.47 (1H, m)                                     | 70.5     |
| 4                      | 4.89 [1H, t, J = 9.6 Hz, R4-H (R, rhamnosyl portion)] | 76.6     |
| 5                      | 3.89-3.47 (1H, m)                                     | 67.5     |
| 6                      | 1.04 (3H, d, J = 6.2 Hz, R6-H)                        | 17.5     |
| <b>5-O-glucosyl</b>    |                                                       |          |
| 1                      | 5.31 [1H, d, J = 10.2 Hz, (5G, 5-glycosyl portion)]   | 105.1    |
| 2                      | 3.89-3.47 (1H, m)                                     | 74.6     |
| 3                      | 3.89-3.47 (1H, m)                                     | 77.1     |
| 4                      | 3.89-3.47 (1H, m)                                     | 71.4     |
| 5                      | 3.89-3.47 (1H, m)                                     | 77.0     |
| 6                      | 3.89-3.47 (1H, m)                                     | 61.4     |
| <b>p-coumaroyl COO</b> |                                                       |          |
| COO                    |                                                       | 168.3    |
| $\alpha$               | 6.25 (1H, d, J=15.7 Hz)                               | 115.2    |
| $\beta$                | 7.61 (1H, d, J=15.7 Hz)                               | 146.8    |
| 1''                    |                                                       | 127.0    |
| 2'',6''                | 7.43 (2H, d, J= 8.6 Hz,)                              | 131.2    |
| 3'',5''                | 6.83 (2H, d, J = 8.6 Hz)                              | 117.1    |
| 4''                    |                                                       | 160.2    |

**Table S2 Primer Sequences for qRT-PCR.**

| Gene           | Forward (5' to 3')     | Reverse (5' to 3')    |
|----------------|------------------------|-----------------------|
| COX-2          | AGATGACTGCCCAACTCCCA   | GTGAACCCAGGTCCTCGCT   |
| TNF- $\alpha$  | TGTCTCAGCCTCTTCTCATTCC | TTTGTGAGTGTGAGGGTCTGG |
| IL-6           | CCGGAGAGGAGACTTCACAG   | CAGAATTGCCATTGCACAAC  |
| $\beta$ -actin | TGTCACCAACTGGGACGATA   | GGGGTGTTGAAGGTCTCAAA  |

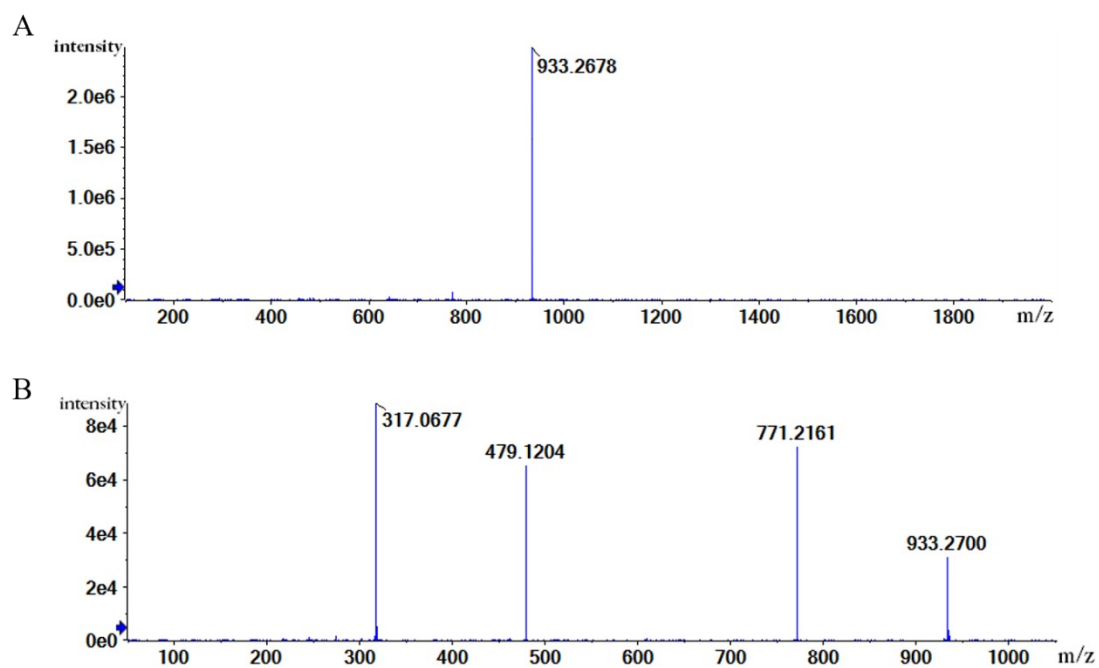

Figure S1. The MS and MS/MS data for obtained fraction (F1 in Fig. 1A) isolated from anthocyanin extract of *Lycium ruthenicum* Murr. fruit (LRF).

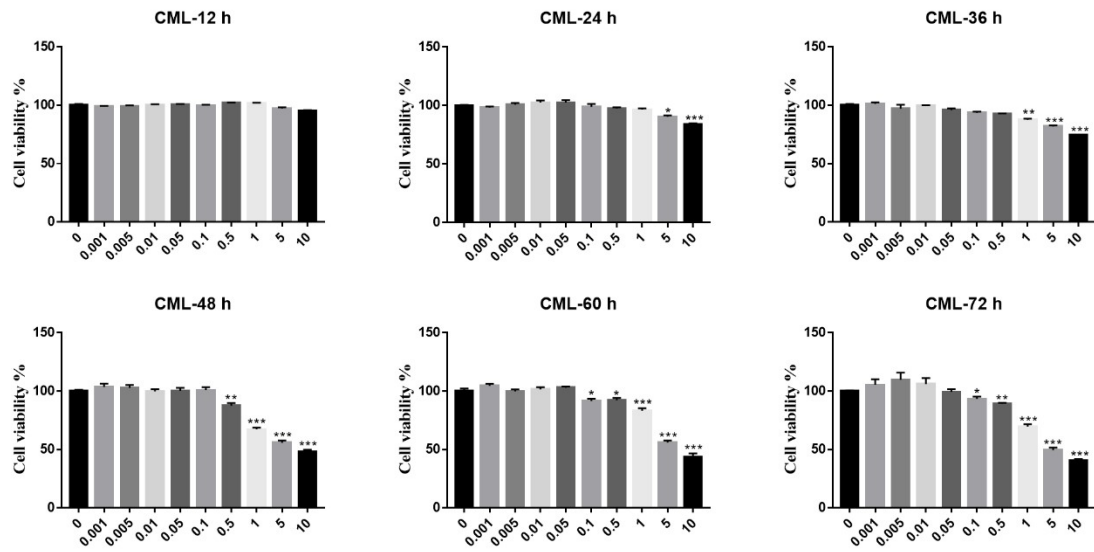

Figure S2. Dose-dependent cytotoxic activity of CML on Neuro-2a cells. Cells were incubated with 0-10 mM CML for 12-72 h and measured for cell viability by CCK8 assay (n = 6).

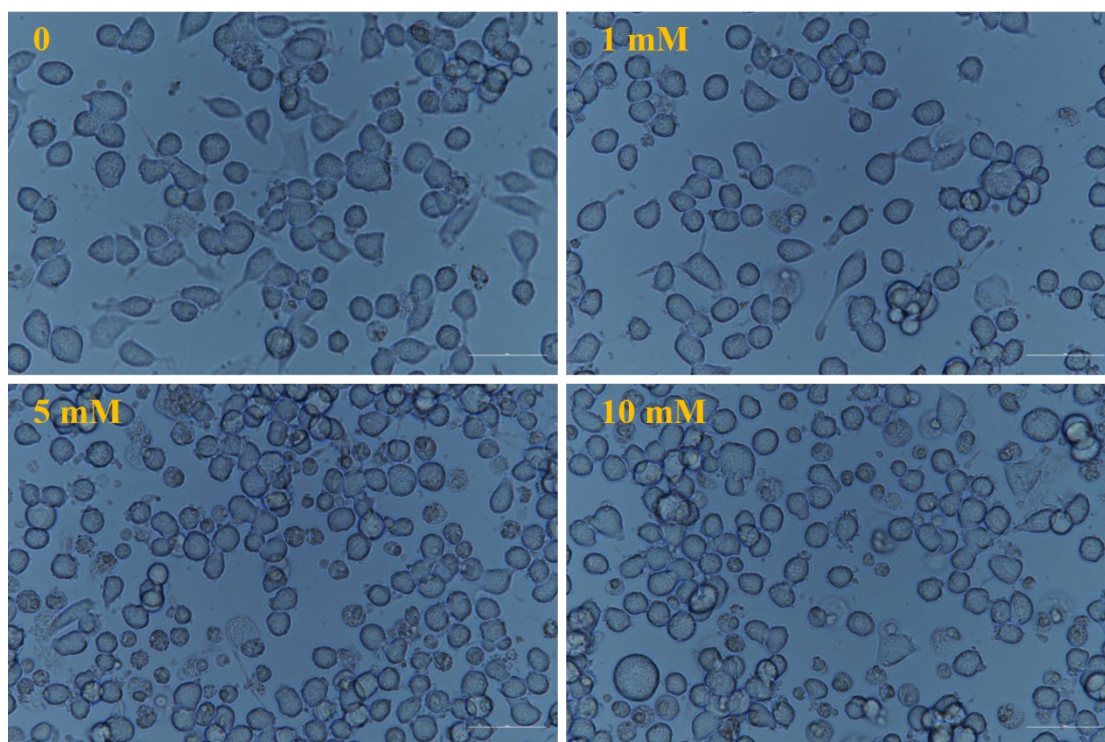

Figure S3. Representative photographs recorded by optical microscope (400  $\times$ ). Cells were treated with CML for 48 h and subjected for morphology observation.

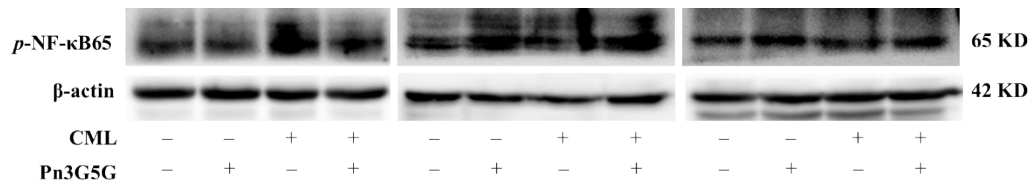

Figure S4. Western blot analysis of three independent experiments. Protein samples were prepared after three independent treatments of CML or Pn3G5G for 48 h.
